# Supplementary material for: Monomeric, trimeric, and tetrameric transition metal complexes (Mn, Fe, Co) containing N,N-bis(2-pyridylmethyl)-2-aminoethanol/-ate: preparation, crystal structure, molecular magnetism and oxidation catalysis
Source: Royal Society of Chemistry journal article supplement (doi:10.1039/c1dt10028a), 2011-01-01
Supplement: c1dt10028a.pdf [file c1dt10028a.pdf]

## Supporting Information

Monomeric, trimeric, and tetrameric transition metal complexes (Mn, Fe, Co)  
containing *N,N*-bis(2-pyridylmethyl)-2-aminoethanol/-ate: preparation, crystal structure,  
molecular magnetism and oxidation catalysis

Jong Won Shin, Sankara Rao Rowthu, Min Young Hyun, Young Joo Song, Cheal Kim,  
Bong Gon Kim, and Kil Sik Min

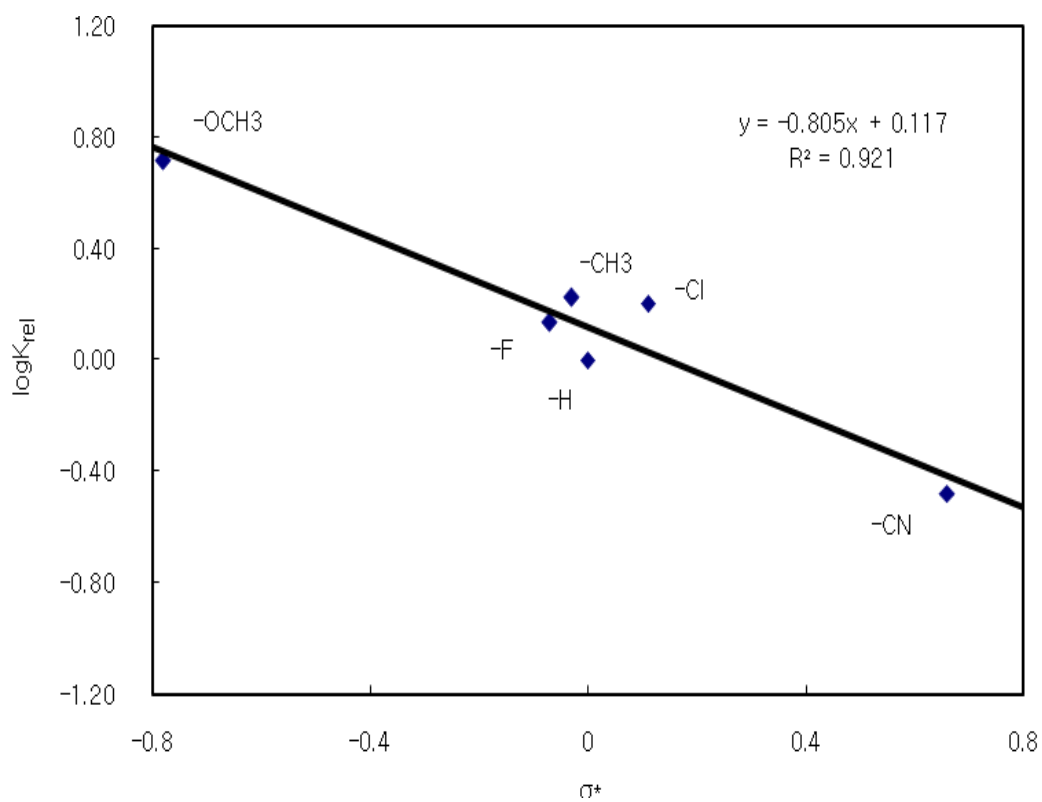

**Fig. S1** Hammett plot for relative reactivities of styrene to *para*-substituted styrenes with **6**.
